# Supplementary material for: Acute Intermittent Porphyria in Argentina: An Update
Source: Hindawi journal article supplement (doi:10.1155/2015/946387), 2015-01-01
Supplement: f1 [file 946387.f1.pdf]

| <b>Primer</b>   | <b>Amplified Region</b>               | <b>Sequence of the primer (5' → 3')</b> |
|-----------------|---------------------------------------|-----------------------------------------|
| <b>PR3</b>      | Promotor, Ex 1, Intron 1<br>(4200 bp) | TGCTCCCACCTTCAGTTACTTGTCTTTA            |
| <b>PR4</b>      |                                       | CTGCGGGTAGAGATTTGGATTAGTCCTG            |
| <b>LR3</b>      | Exon 3 to Exon 15<br>(5.500 bp)       | AAGGGACCAGCCTTGGAGTATTTCCCCACTC         |
| <b>LR4</b>      |                                       | GTTCCATCTTCCCGCCAACTCCACACGC            |
| <b>PBGF3800</b> | Exon 3 to Exon 6<br>(1600 bp)         | GTCTACTCCATGTGGCAT                      |
| <b>EP48</b>     |                                       | AGACCTAGCATACTAGGG                      |
| <b>AD76</b>     | Exon 7<br>(240 bp)                    | CCCTAGGCTCCACCACTGAAG                   |
| <b>EP77</b>     |                                       | AGGGTCAGGCCCCAAAGGGAAAGG                |
| <b>AD8</b>      | Exon 8 to Exon 9<br>(400 bp)          | CGAGAGAGAATAGAGGTGATC                   |
| <b>EP12</b>     |                                       | TTGTCTTTTTCTTGGCTG                      |
| <b>AD10</b>     | Exon 10 to Exon13<br>(1600 bp)        | TCAGGCAGAGGGAACCGCACGA                  |
| <b>AD11</b>     |                                       | AGAAGGTTGTGAGACAAGCTTC                  |
| <b>AD12.1</b>   | Exon 12 to Exon 15<br>(960 bp)        | ATGCTTTGCGCCATTGGTTGG                   |
| <b>EP15.2</b>   |                                       | GCACTGGACAGCAGCAAC                      |

Primers used for amplifying the promoter, all exons and intron boundaries of the HMBS gene.

| <b>Region</b>               | <b>Primer</b> | <b>Sequence of the primer (5' → 3')</b> |
|-----------------------------|---------------|-----------------------------------------|
| <b>Intron 2 to Intron 3</b> | LR3           | AAGGGACCAGCCTTGGAGTATTTCCCCACTC         |
|                             | Pr4           | CTGCGGGTAGAGATTTGGATTAGTCCTG            |
| <b>Exon 4 to 6</b>          | EP71          | CCTAACCTGTGACAGTCT                      |
|                             | EP48          | AGACCTAGCATACTAGGG                      |
| <b>Exon 7</b>               | EP77          | AGGGTCAGGCCCCAAAGGGAAAGG                |
|                             | AD76          | CCCTAGGCTCCACCACTGAAG                   |
| <b>Exon 8 to 9</b>          | AD8           | CGAGAGAGAATAGAGGTGATC                   |
|                             | EP12          | TTGTCTTTTTTCCTTGGCTGC                   |
| <b>Exon 10 to 11</b>        | AD10          | TCAGGCAGAGGGAACCGCACGA                  |
|                             | AD11          | AGAAGGTTGTGAGACAAGCTTC                  |
| <b>Exon 12 to 15</b>        | AD12.1        | ATGCTTTGCGCCATTGGTTGG                   |
|                             | EP15.2        | GCACTGGACAGCAGCAAC                      |

Primers used for sequencing the promoter region, all exons and exon/intron boundaries
